# Supplementary material for: Phosphorylation controls spatial and temporal activities of motor‐PRC1 complexes to complete mitosis
Source: PubMed Central journal article supplement (PMC10620760; doi:10.15252/embj.2023113647), 2023-08-18
Supplement: EMBJ-42-e113647-s004.pdf [file EMBJ-42-e113647-s004.pdf]

## Expanded View Figures

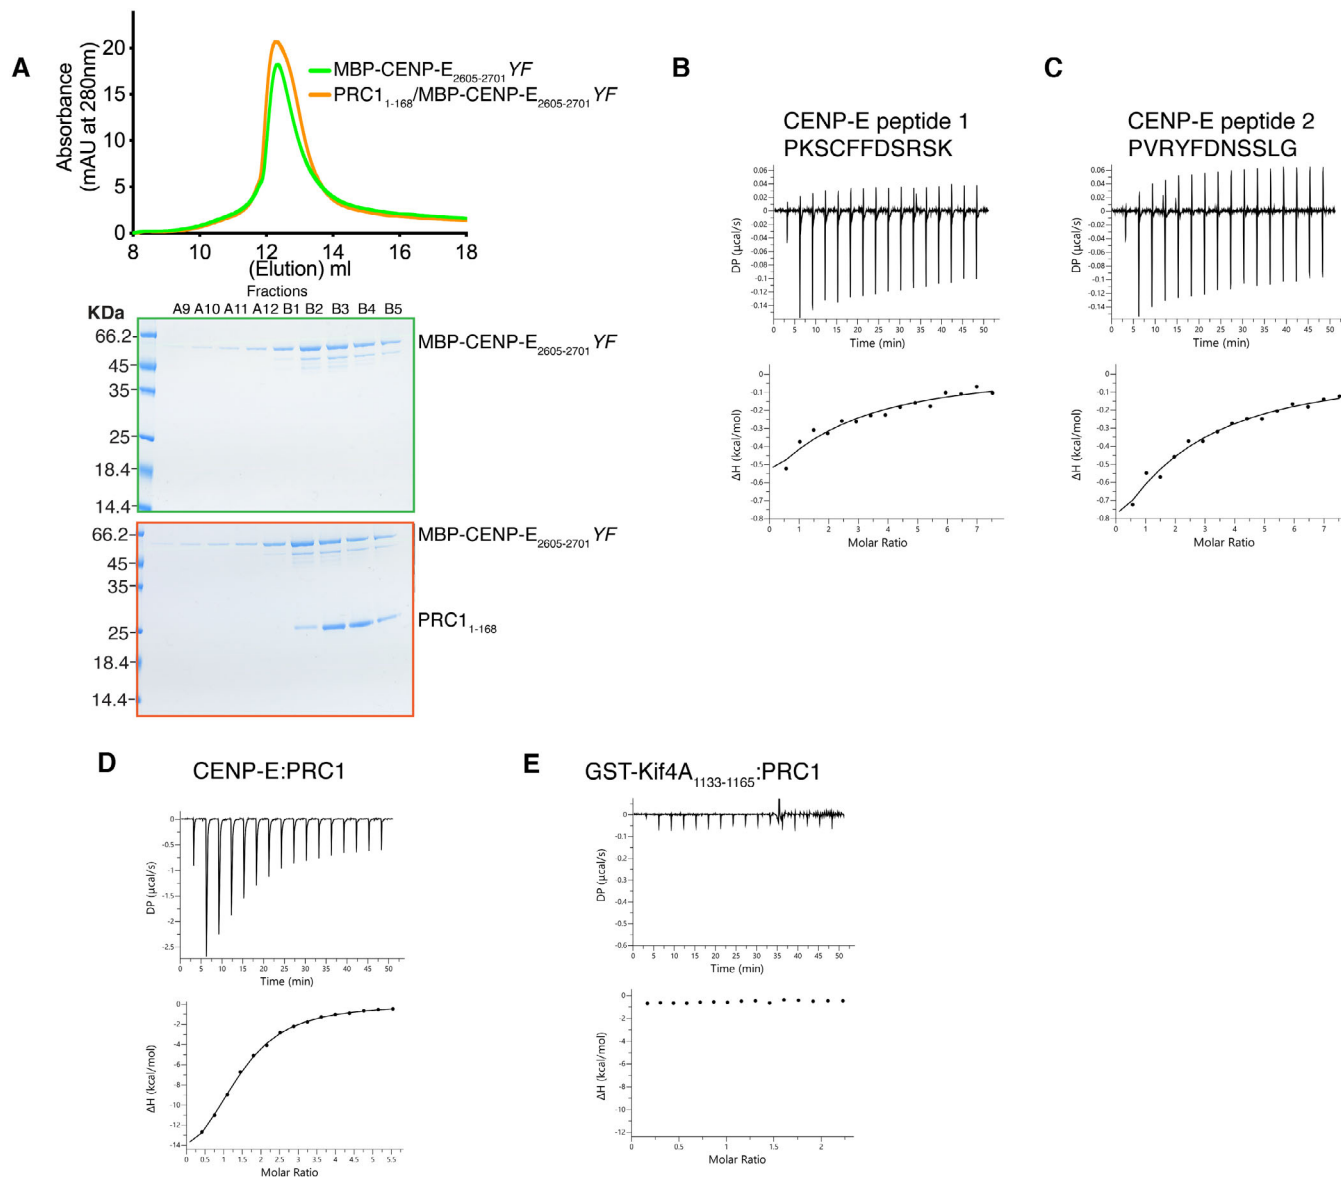

**Figure EV1. Characterization of the PRC1/CENP-E interaction.**

- A Top. Size-exclusion chromatography elution profile of MBP-CENP-E<sub>2605-2701</sub> YF (green) and MBP-CENP-E<sub>2605-2701</sub> YF/PRC1<sub>1-168</sub> (orange). Bottom, Coomassie-stained gel showing the size-exclusion chromatography profile of MBP-CENP-E<sub>2605-2701</sub> YF (green) and MBP-CENP-E<sub>2605-2701</sub> YF/PRC1<sub>1-168</sub> (orange). No shift in the elution profile was observed.
- B-E Characterization by isothermal titration calorimetry of binding between PRC1<sub>1-168</sub> and CENP-E peptides containing 1 motif, CENP-E<sub>2605-2701</sub>, and GST-Kif4A<sub>1133-1165</sub>. The y-axis indicates kcal/mole of injectant.

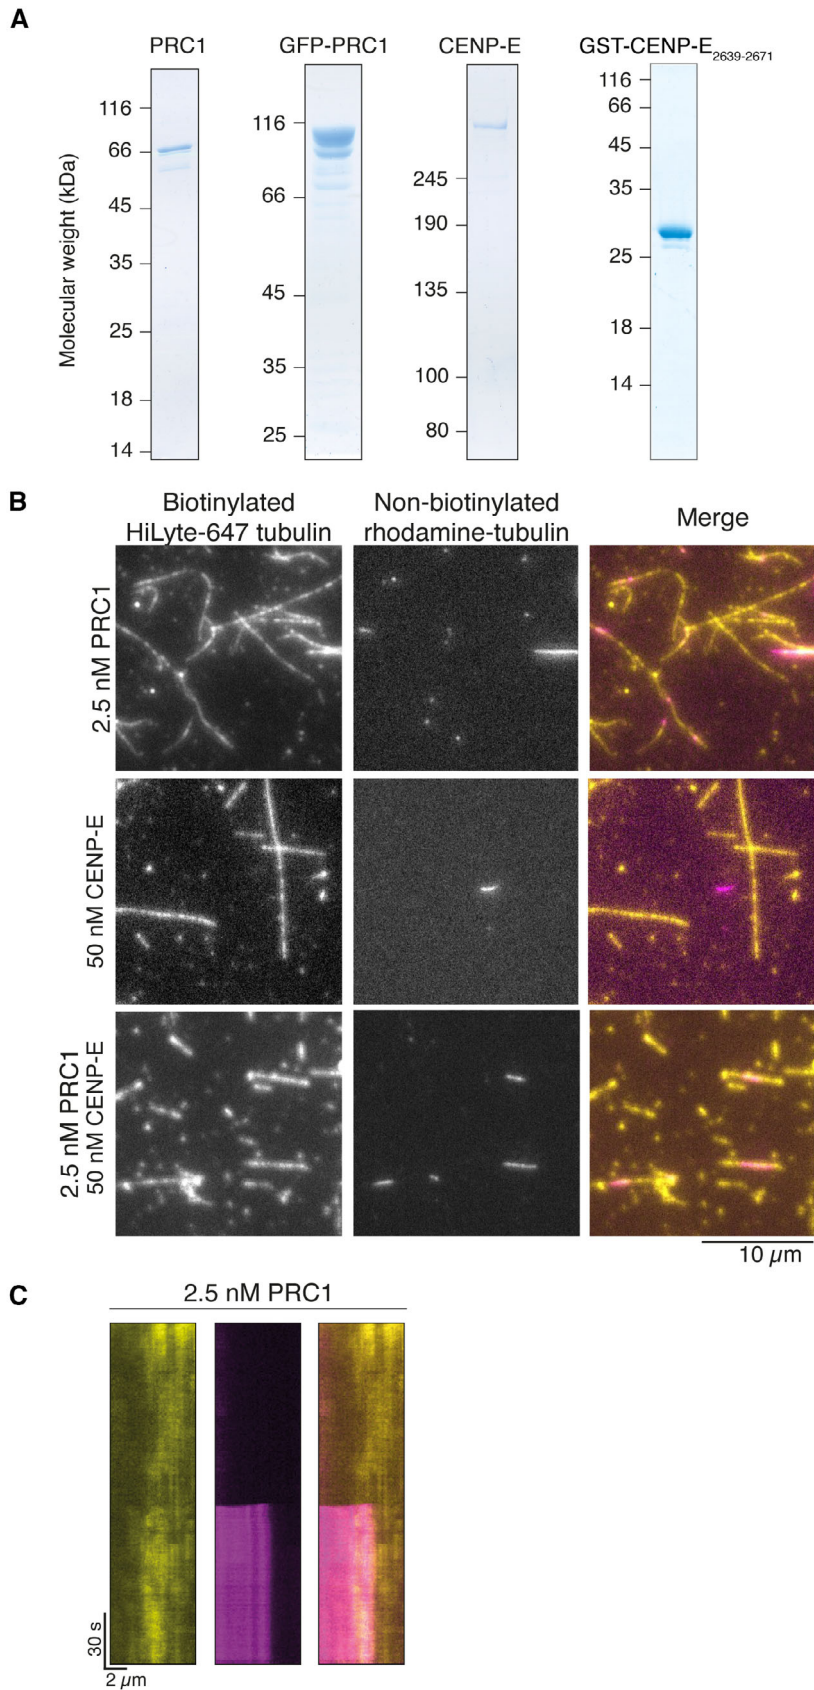

**Figure EV2. Human CENP-E<sub>FL</sub> does not bundle microtubules in the presence of ATP.**

- A Coomassie-stained gel showing purified His-PRC1, His-GFP-PRC1, full-length CENP-E and GST-CENP-E<sub>2639-2671</sub>. (B) Bundling of microtubules by 2.5 nM PRC1 *in vitro*. Non-biotinylated rhodamine tubulin (pink) and biotinylated HiLyte-647 tubulin (yellow), scalebar 5  $\mu$ m.
- B Crosslinking of microtubules by 2.5 nM PRC1, 50 nM CENP-E<sub>FL</sub> or both *in vitro*. In the absence of PRC1, rhodamine-labelled microtubules in solution (pink) are not crosslinked to biotinylated surface-bound Hilyte-647-labeled microtubules (yellow). Scalebar: 10  $\mu$ m.
- C Kymograph showing cross-linking of a free microtubule to an immobilized microtubule after approximately 15 s of imaging.
